# Supplementary material
Source: publisher site journal article supplement (doi:10.18632/aging.203549)
Supplement: Supplementary file 2 [file aging-v13-203549-supplementary-material-SD1.pdf]

**SUPPLEMENTARY FIGURES**

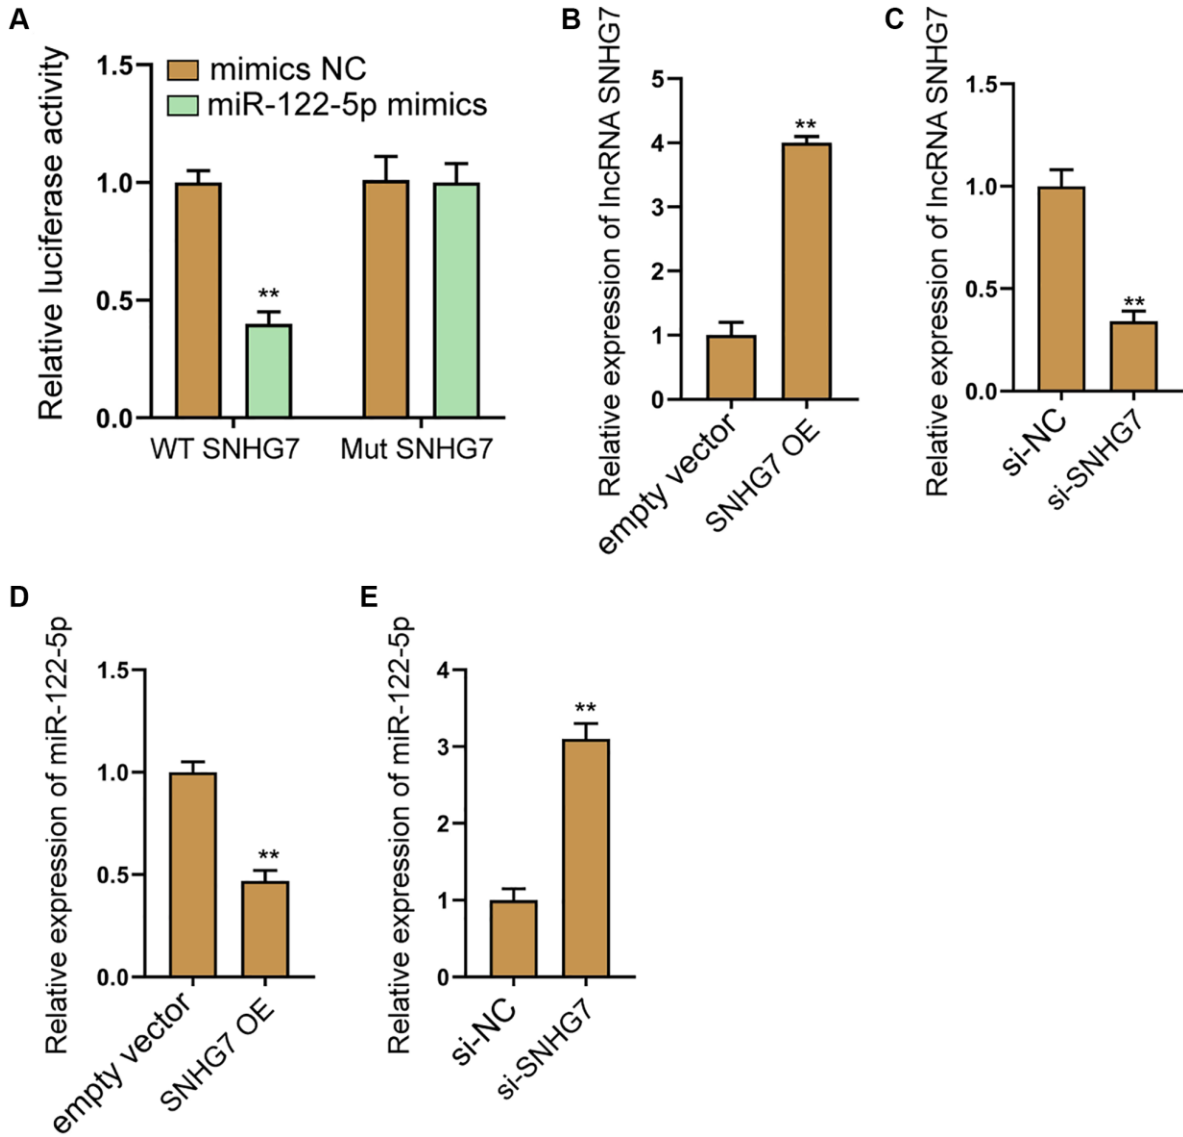

**Supplementary Figure 1. LncRNA SNHG7 acted upstream of miR-122-5p.** (A) The binding capacity was evaluated by luciferase reporter assay. (B and C) Relative expression of lncRNA SNHG7 in SiHa cells with SNHG7 OE or si-SNHG7. (D and E) Relative expression of miR-122-5p in SiHa cells with SNHG7 OE or si-SNHG7. WT SNHG7, wild type lncRNA SNHG7; Mut SNHG7, mutant type lncRNA SNHG7; mimics NC, negative control mimics; SNHG7 OE, lncRNA SNHG7 overexpression; si-NC, negative control siRNA; si-SNHG7, lncRNA SNHG7 siRNA. \*\* $p < 0.01$ , \*\*\* $p < 0.001$ .

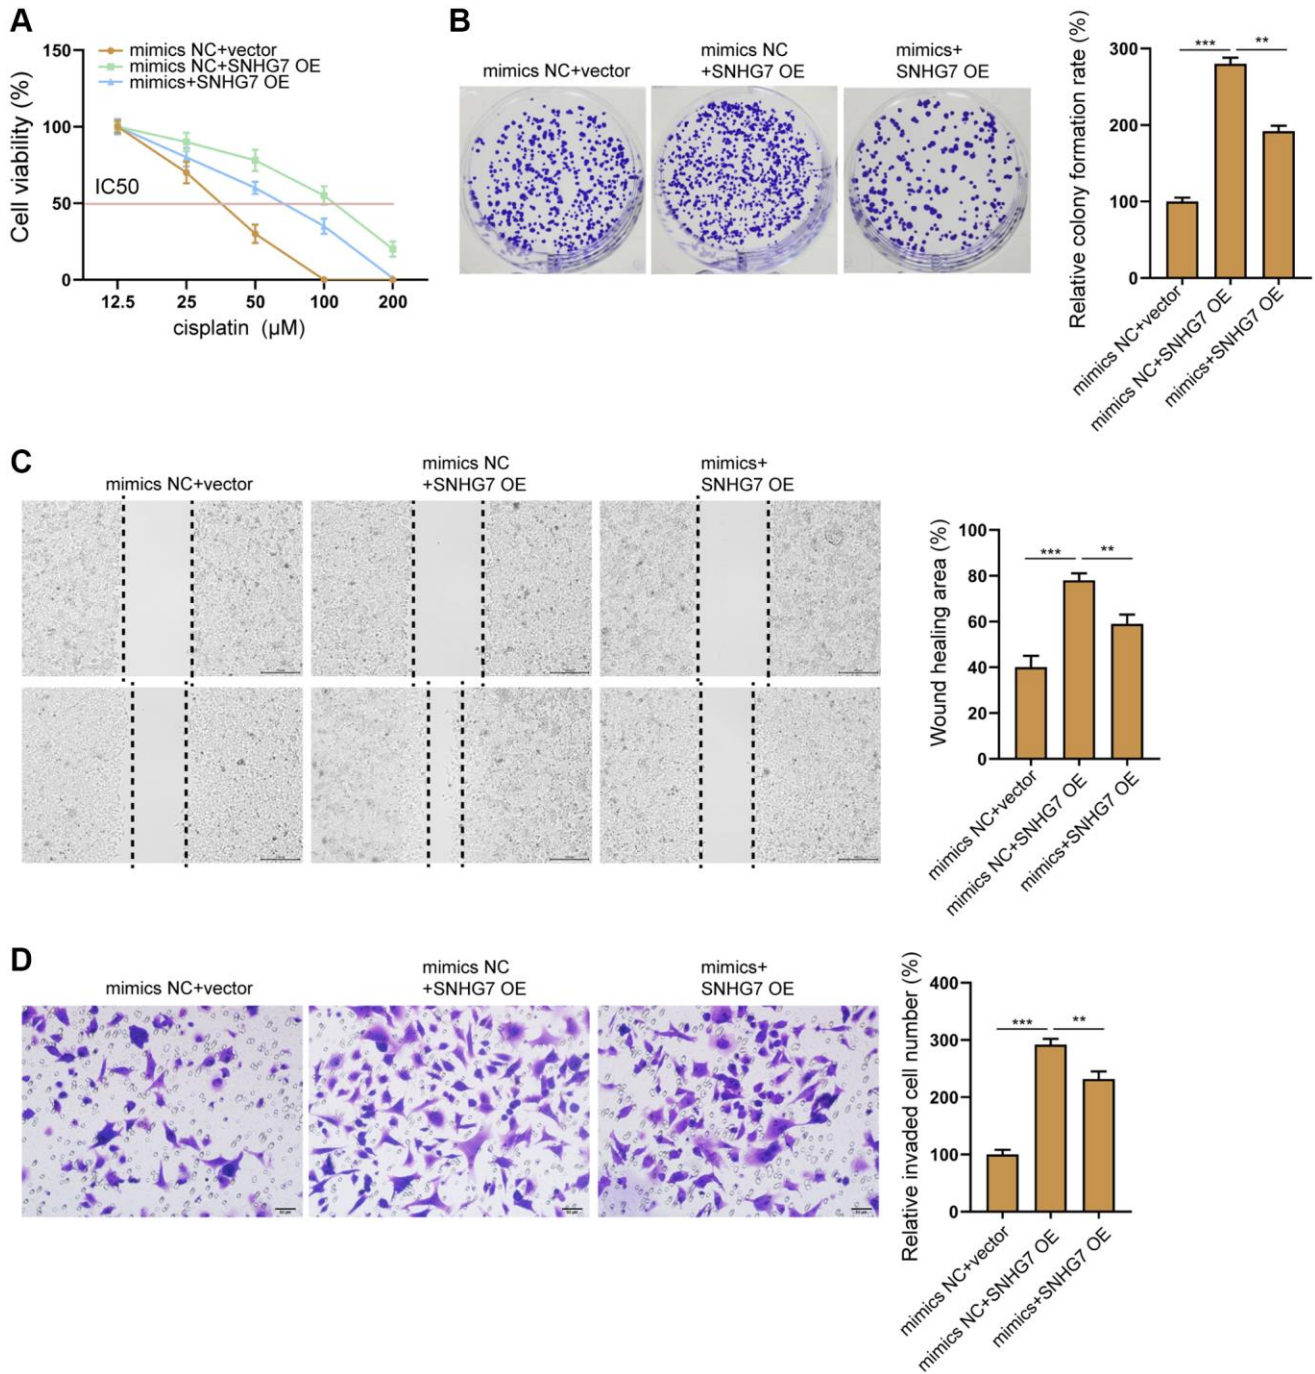

**Supplementary Figure 2. MiR-122-5p antagonized the biological roles of lncRNA SNHG7 in promoting malignant behaviors of SiHa cells.** IC50 value (A), colony formation (B), migratory capacity (C), and invasive capacity (D) of SiHa cells in the presence or absence of SNHG7 OE and miR-122-5p mimics. mimics NC, negative control mimics; SNHG7 OE, lncRNA SNHG7 overexpression; mimics, miR-122-5p mimics; IC50, half maximal inhibitory concentration. \* $p < 0.05$ , \*\* $p < 0.01$ , \*\*\* $p < 0.001$ .

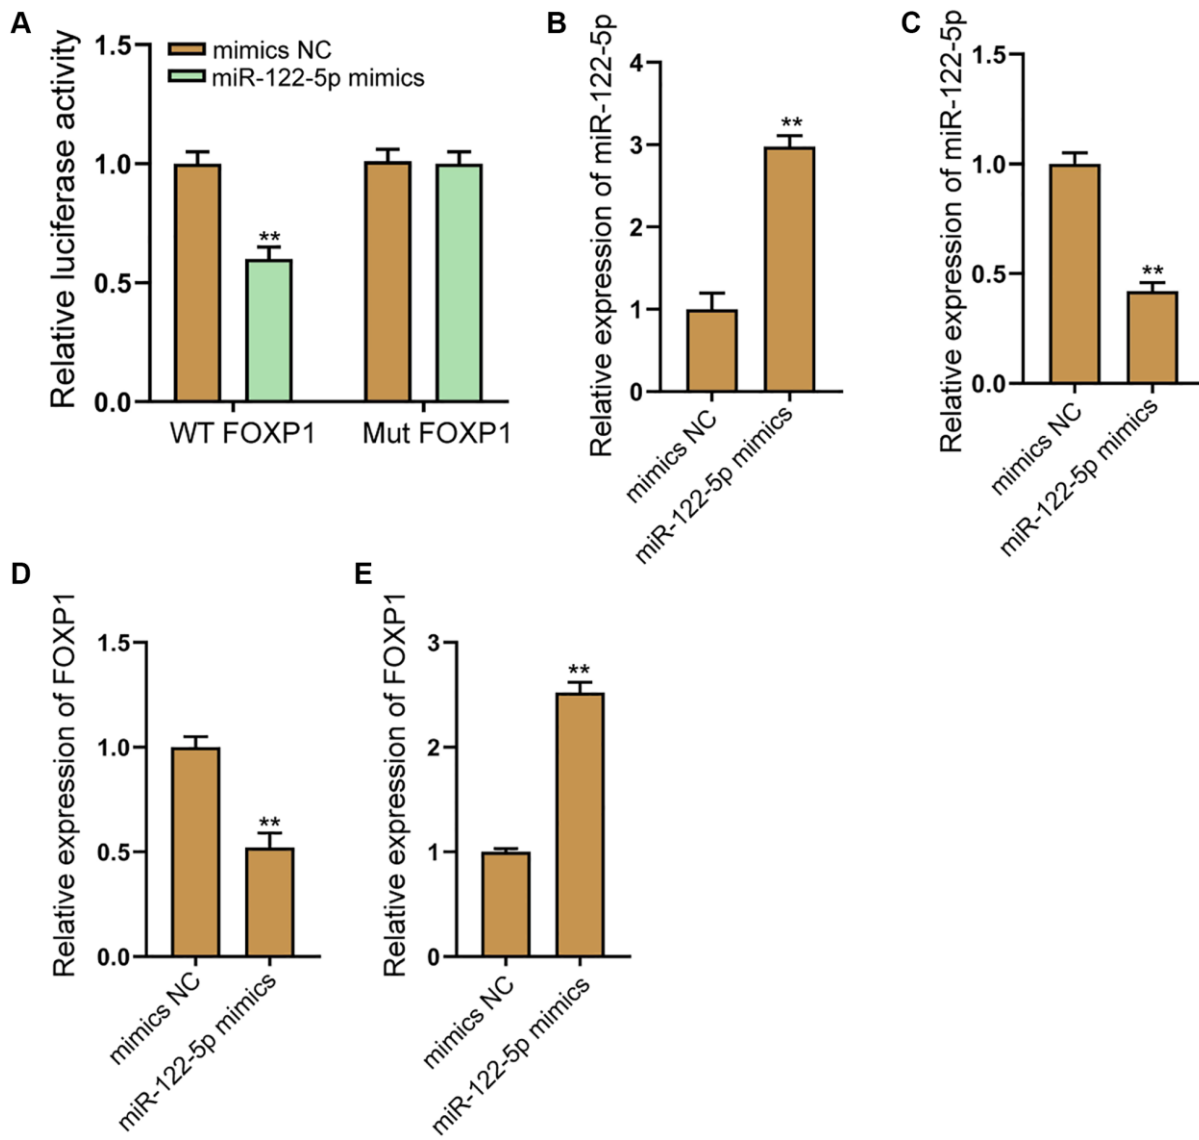

**Supplementary Figure 3. FOXP1 was the downstream molecule of miR-122-5p.** (A) The binding capacity was evaluated by luciferase reporter assay. (B and C) Relative expression of miR-122-5p in SiHa cells with miR-122-5p mimics transfection or miR-122-5p inhibitor transfection. (D and E) Relative expression of FOXP1 in SiHa cells with miR-122-5p mimics transfection or miR-122-5p inhibitor transfection. \*\* $p < 0.01$ , \*\*\* $p < 0.001$ .

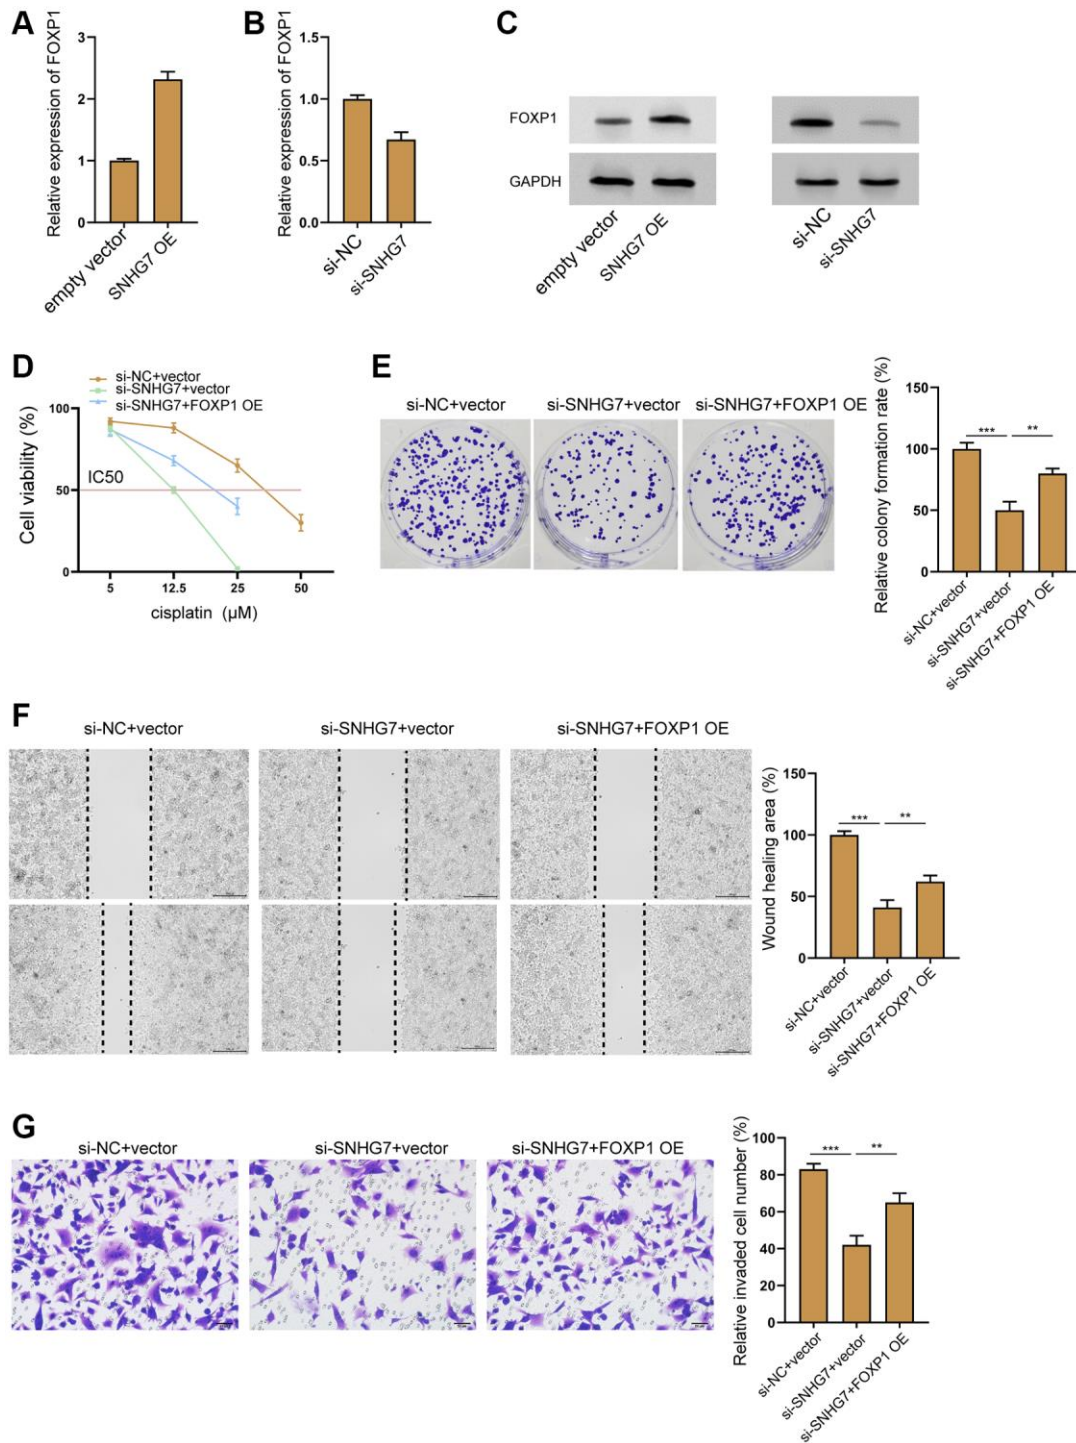

**Supplementary Figure 4. FOXP1 overexpression rescued the biological roles of lncRNA SNHG7 knockdown in SiHa cells.** (A–C) Relative expression of FOXP1 in SiHa cells with SNHG7 OE and si-SNHG7 transfection. IC50 value (D), colony formation (E), migratory capacity (F), and invasive capacity (G) of SiHa cells in the presence or absence of si-SNHG7 and FOXP1 OE. SNHG7 OE, lncRNA SNHG7 overexpression; si-NC, negative control siRNA; si-SNHG7, lncRNA SNHG7 siRNA; FOXP1 OE, FOXP1 overexpression; IC50, half maximal inhibitory concentration. \*\* $p < 0.01$ , \*\*\* $p < 0.001$ .
